# Supplementary material for: IL-23-mediated mononuclear phagocyte crosstalk protects mice from Citrobacter rodentium-induced colon immunopathology
Source: PubMed Central journal article supplement (PMC4382688; doi:10.1038/ncomms7525), 2015-03-12
Supplement: ncomms7525-s1.pdf [file ncomms7525-s1.pdf]

## Supplementary Information

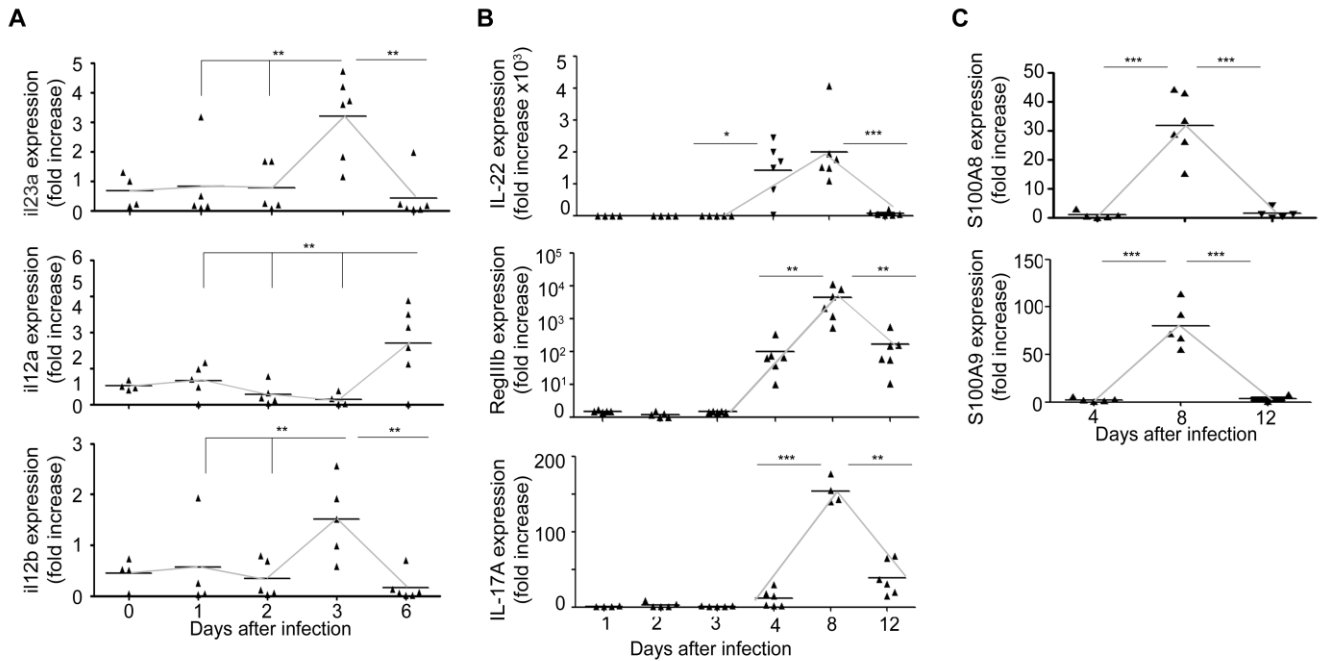

### Supplementary Figure 1. Cytokine dynamics during the early host response to *C. rodentium* infection in WT mice.

Mice were infected with  $10^9$  CFU of *C. rodentium* by gavage and a time-course RT-PCR analysis of infected colonic tissue was performed. (A) *il23a* and *il12b* were upregulated on day 3, *il12a* was upregulated on day 6. (B) IL-22 was found upregulated on day 4 and day 8, waning by day 12. IL-17A, RegIII $\beta$ , S100A9 and S100A8 (C) were found upregulated on day 8 (n=4-6 per group from 3 individual experiments). The data are represented as fold increase normalized to non-starved and non-infected mice. Asterisk P<0.05, two asterisks P<0.01, three asterisks P<0.001.

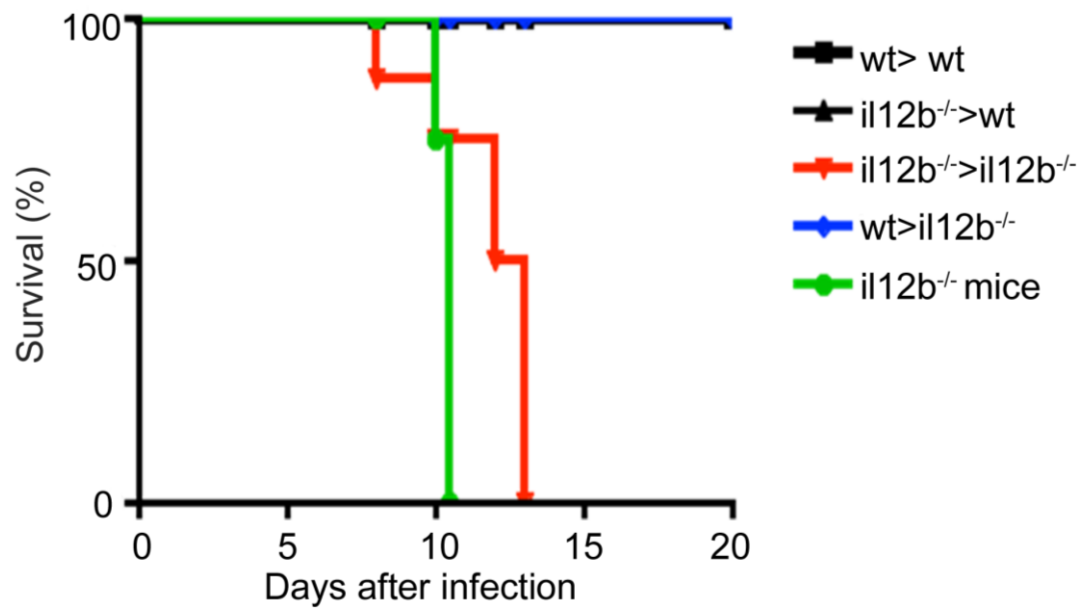

### Supplementary Figure 2

Survival curves of *Citrobacter*-challenged [WT > WT], [*il12b*<sup>-/-</sup>> WT], [*il12b*<sup>-/-</sup>>*il12b*<sup>-/-</sup>] and [WT > WT] BM chimeras, as well as *il12b*<sup>-/-</sup> mice. (n = 6 per group).

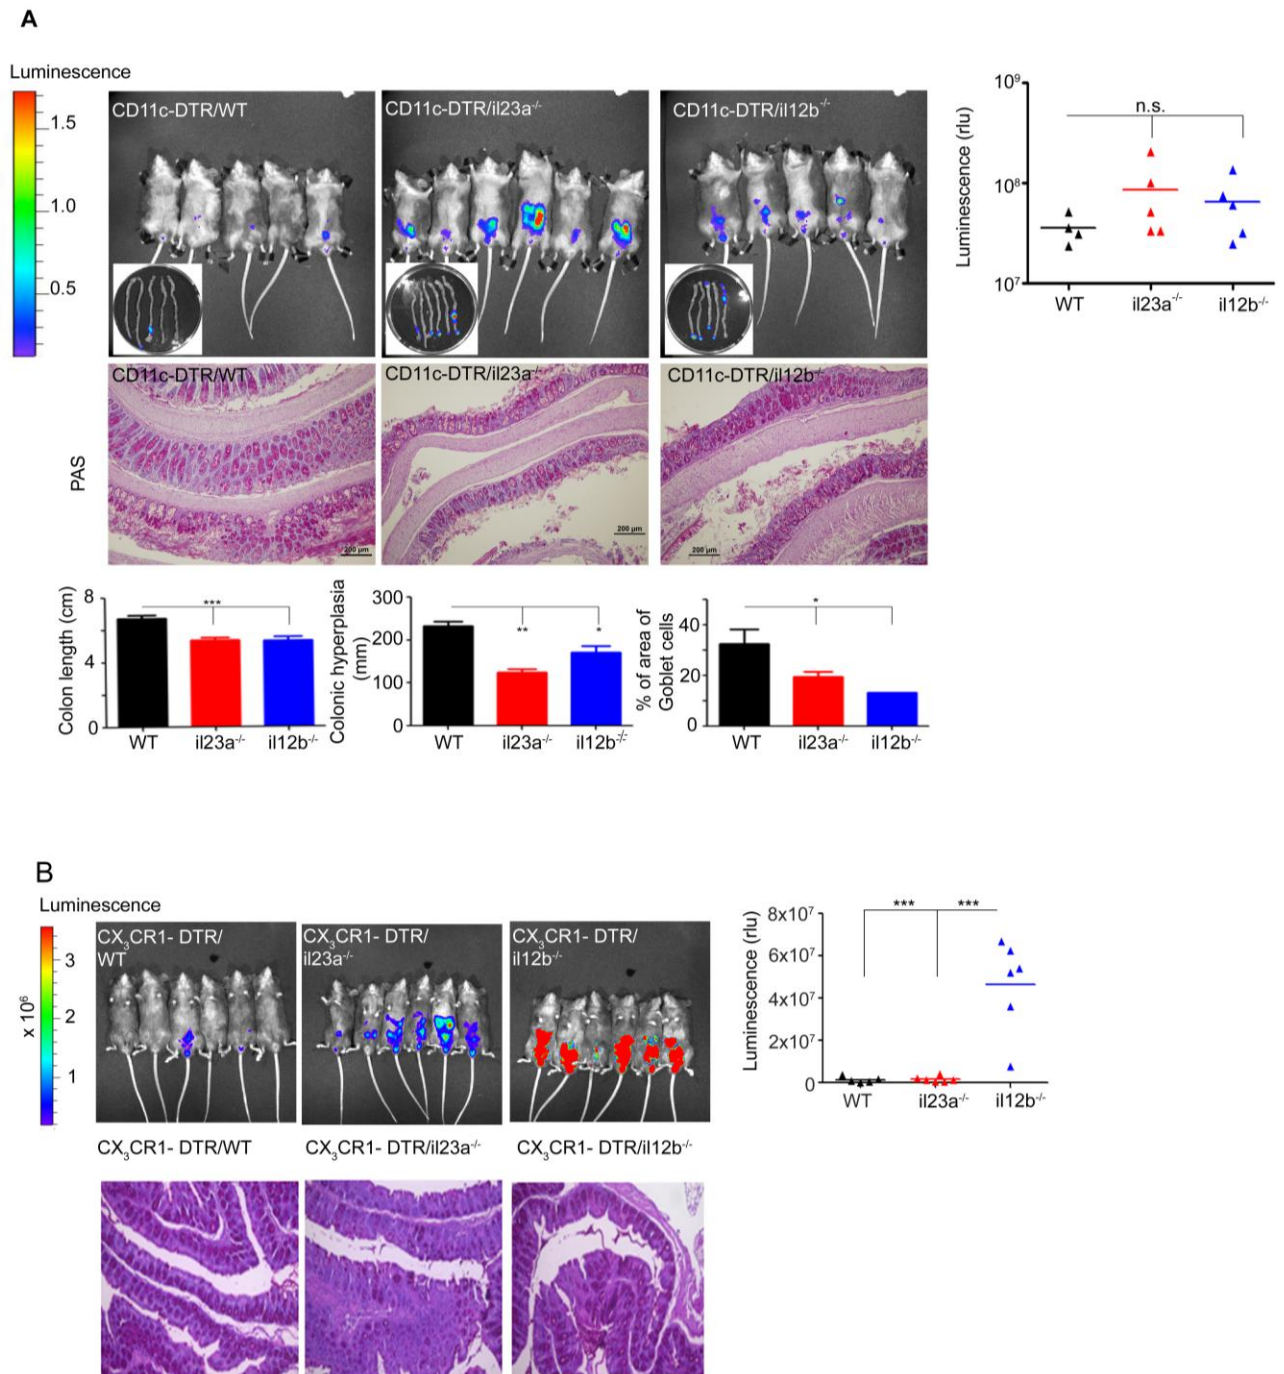

### Supplementary Figure 3

**(A)** Analysis of bacterial load and goblet cell status (PAS staining) at day 7; note loss of enterocytes and decrease in mucosal hyperplasia in [*il23a*<sup>-/-</sup>/CD11c-DTR > WT], [*il12b*<sup>-/-</sup>/CD11c-DTR > WT] and [WT / CD11c-DTR >WT] BM chimeras. Bar diagrams indicate colon lengths, colonic hyperplasia and goblet cell abundance.

**(B)** Bacterial load and histology of *C. rodentium* - infected DTx-treated mixed [*il23a*<sup>-/-</sup>/ CX<sub>3</sub>CR1-DTR > WT], [*il12b*<sup>-/-</sup>/ CX<sub>3</sub>CR1-DTR > WT] and [WT / CX<sub>3</sub>CR1-DTR > WT] BM chimeras on day 8 post infection (n=5-6 per group from 3 individual experiments).

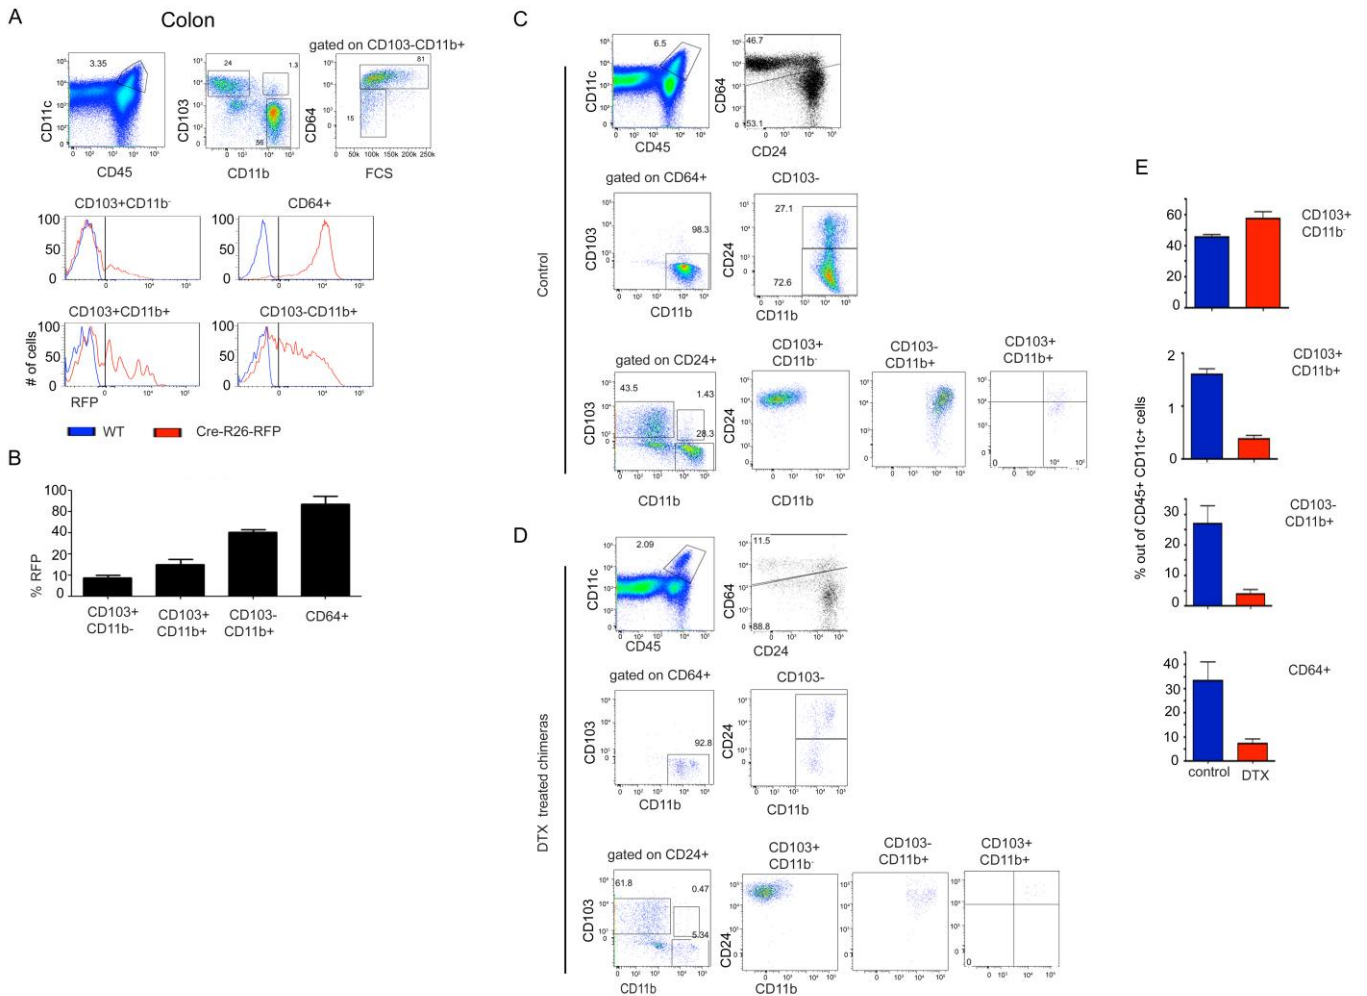

### Supplementary Figure 4

- (A)** Flow cytometric analysis of colonic mononuclear phagocyte compartment of  $CX_3CR1^{Cre/+};R26-RFP$  mice for reporter gene expression.
- (B)** Bar diagram summarizes data (n=3 per group from three individual experiments).
- (C, D)** Flow cytometric analysis of colonic mononuclear phagocyte compartment of DTx-treated [ $CX_3CR1-DTR > WT$ ] BM chimeras 5 days after DTX treatment.
- (E)** Bar diagram summarizes data (n=3 per group from three individual experiments).

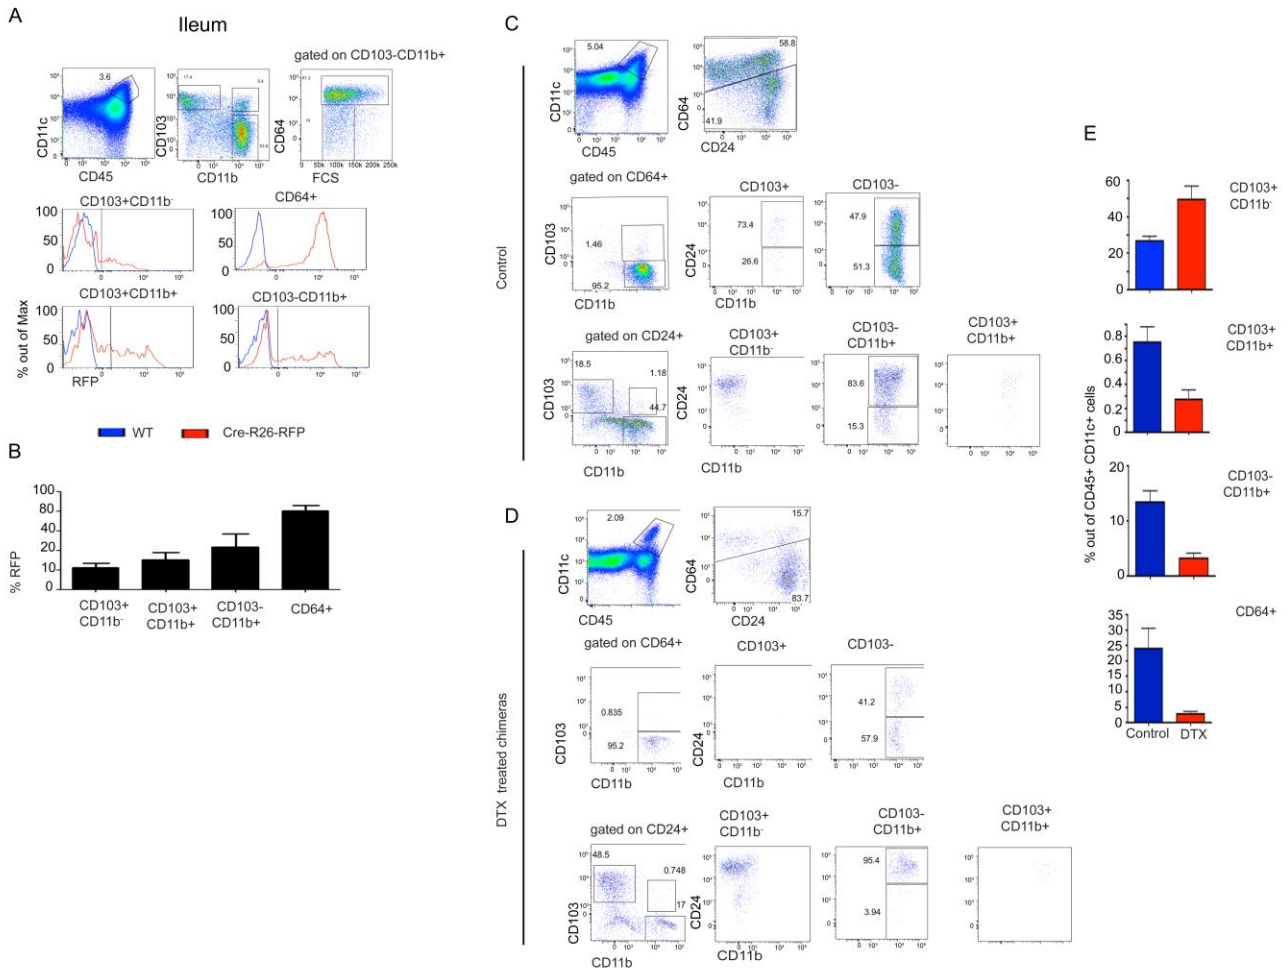

### Supplementary Figure 5

**(A)** Flow cytometric analysis of ileal mononuclear phagocyte compartment of  $CX_3CR1^{Cre/+};R26-RFP$  mice for reporter gene expression.

**(B)** Bar diagram summarizes data (n=3 per group from three individual experiments).

**(C, D)** Flow cytometric analysis of ileal mononuclear phagocyte compartment of DTx-treated [ $CX_3CR1-DTR > WT$ ] BM chimeras.

**(E)** Bar diagram summarizes data (n=3 per group from three individual experiments).

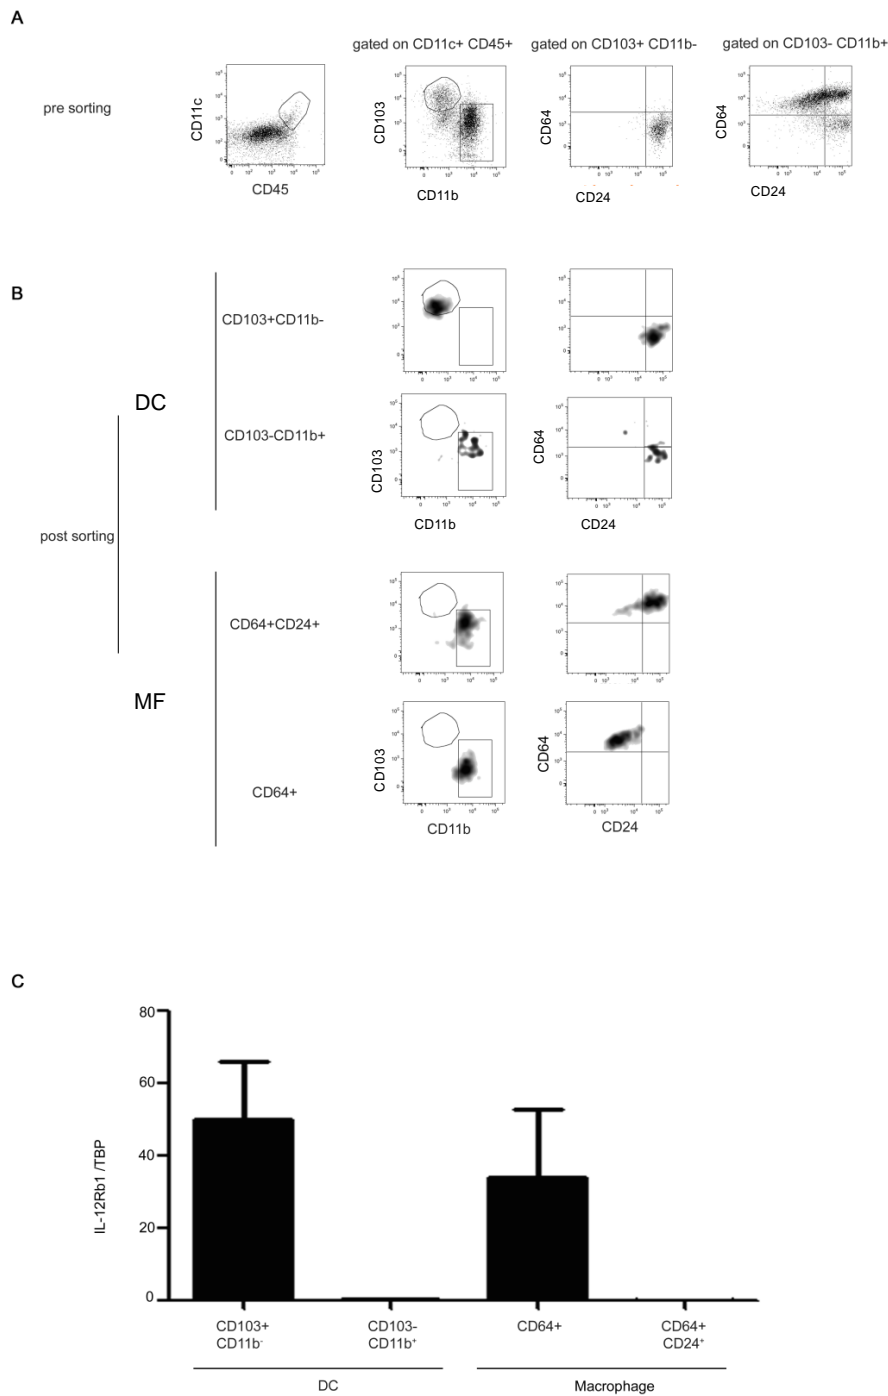

### Supplementary Figure 6

Flow cytometry sorting strategy for colonic lamina propria resident DC and macrophages. Representative flow cytometry images used to identify and sort colonic DC and macrophages of WT mouse. **(A)** presort analysis; **(B)** postsort analysis

**(C)** RT-PCR analysis of *IL12rb1* expression on FACS sorted lamina propria DC and macrophages isolated from infected WT mice three days post infection. Data are representative of 3 independent experiments with DC and macrophages pooled from 7-10 mice.

## Supplementary Table 1

### Real-time PCR primers

The sequences for primers used in this study are as follows:

| Primers        | Forward                                   | Reverse                               |
|----------------|-------------------------------------------|---------------------------------------|
| IL-17A         | 5'-GCT CCA GAA GGC CCTCAG A-3'            | 5'-CTT TCC CTC CGC ATT GAC A-3'       |
| IL-6           | 5'-TCC AAT GCT CTC CTA ACA GAT AAG-3'     | 5'-CAA GAT GAA TTG GAT GGT CTT G-3'   |
| IL-12p40       | 5'-ACA TCT ACC GAAGTC CAA TGC A-3'        | 5'-GGA ATT GTA ATA GCG ATC CTG AGC-3' |
| IL-23p19       | 5'-GGT GGC TCA GGG AAA TGT-3'             | 5'-GAC AGA GCA GGCAGG TAC AG-3'       |
| IL-12 p35      | 5'- GCC ACC CTT GCC CTC CTA A -3'         | 5'- GGT TTG GTC CCG TGT GAT GTC -3'   |
| IFN $\gamma$   | 5'- ATG GCT GTT TCT GGC TGT TAC TG -3'    | 5'- ATC TGG CTC TGC AGG ATT TTC A -3' |
| S100A8         | 5'- TGT CCT CAG TTT GTG CAG AAT ATA AA-3' | 5'-TCA CCA TCG CAA GGA ACT CC-3'      |
| RegIII $\beta$ | 5'- ATG GCT CCT ACT GCT ATG CC-3'         | 5'- GTG TCC TCC AGG CCT CTT T-3'      |
| IL-22          | 5'-TCC GAG GAG TCA GTG CTA AA-3'          | 5'-AGA ACG TCT TCC AGG GTG AA-3       |
| TBP            | 5'-GAAGCTGCGGTACAATTCCAG-3'               | 5'-CCCCTTGTACCCTTCACCAAT-3'           |
| IL-23R         | 5'-TGGTGTCACGGAGGAATCACAAGT3'             | 5'-AGATTCCCTTGGTCGGCAGTGCTTA3'        |
| S100A9         | 5'-GGT GGA AGC ACA GTT GGC A-3'           | 5'-GTG TCC AGG TCC TCC ATG ATG-3'     |
| IL-12Rb1       | 5'-CCCCAGCGCTTTAGCTTT-3'                  | 5'GCCAATGTATCCGAGACTGC-3'             |
